# Supplementary material for: Antibiotic Resistance of Uropathogens Isolated from Patients Hospitalized in District Hospital in Central Poland in 2020
Source: MDPI journal article supplement (doi:10.3390/antibiotics10040447), 2021-04-16
Supplement: s1 [file s1]

**Table S1.** Results of analysis with using of Chi-square statistics for calculations in order to find significant differences between pairs of proportions (percentages) of isolates and the source of isolation (hospital ward).

| Hospital Ward             | <i>Enterococcus</i> |                | <i>E. coli</i>       | <i>Klebsiella pneumoniae</i> | <i>Proteus miriabilis</i> |
|---------------------------|---------------------|----------------|----------------------|------------------------------|---------------------------|
|                           | <i>faecalis</i>     | <i>faecium</i> |                      |                              |                           |
|                           | <i>p Value</i>      |                |                      |                              |                           |
| Nephrology × Internal     | 0.9023              | 0.3652         | 0.5090               | 0.2891                       | x                         |
| Nephrology × Nephrology   | 0.4467              | 0.7085         | 0.2171               | <b>0.0213 *</b>              | 0.8183                    |
| Nephrology × Orthopaedics | 0.6657              | 0.5766         | 0.3906               | 0.1847                       | 0.6516                    |
| Nephrology × Paediatric   | 0.0608              | 0.7168         | <b>&lt;0.0001 **</b> | <b>0.0043**</b>              | 0.3138                    |
| Internal × Nephrology     | 0.5961              | 0.5961         | 0.6971               | 0.3212                       | 0.8528                    |
| Internal × Orthopaedics   | 0.6367              | 0.4221         | 0.6300               | 0.3449                       | 0.6547                    |
| Internal × Paediatric     | 0.0770              | 0.3020         | <b>0.0008 **</b>     | <b>0.0390 *</b>              | 0.3173                    |
| Nephrology × Orthopaedics | 0.3898              | 0.5164         | 0.7698               | 0.5164                       | 0.6130                    |
| Nephrology × Paediatric   | 0.1501              | 0.5266         | <b>0.0011 **</b>     | 0.1501                       | 0.2598                    |
| Orthopaedics × Paediatric | <b>0.0253 *</b>     | 0.6547         | 0.0589               | x                            | x                         |

Data with *p* value of less than 0.05 was regarded as significant, while with *p* value of less than 0.01 was regarded as highly significant.
